# Supplementary material for: Opioids depress breathing through two small brainstem sites
Source: eLife. 2020 Feb 19;9:e52694. doi: 10.7554/eLife.52694 (PMC7077984; doi:10.7554/eLife.52694)
Supplement: Figure 1—source data 1. [file elife-52694-fig1-data1.xlsx]

## Sheet: Sheet1
				Instantaneous Frequency				Peak Flow				Minute Volume				Tidal Volume				Pause Duration
Normoxia
WeanID	AnimalID		saline	morphine	normalized		saline	morphine	normalized		saline	morphine	normalized		saline	morphine	normalized		saline	morphine	normalized
'155'	'0'		4.67664	1.53286	0.327769		-3.66547	-1.85742	0.506734		-32.4233	-16.8737	0.520418		-0.142197	-0.212025	1.49107		118.763	470.132	351.369
'155'	'2'		4.84606	1.82305	0.376193		-3.20302	-1.8027	0.562812		-20.2695	-17.7612	0.876253		-0.107483	-0.183768	1.70974		173.856	329.735	155.88
'155'	'3'		5.00726	2.00868	0.401154		-3.30018	-1.94758	0.590144		-25.1171	-16.8348	0.670251		-0.112305	-0.185371	1.65059		142.211	373.98	231.769
'155'	'30'		5.21307	2.30962	0.443043		-3.11217	-1.68982	0.54297		-27.0426	-17.4036	0.643564		-0.121421	-0.167692	1.38107		119.793	328.846	209.053
'156'	'0'		5.78025	1.8598	0.321751		-4.36437	-1.93428	0.443198		-31.038	-16.8371	0.542467		-0.134378	-0.191657	1.42625		134.148	433.036	298.887
'156'	'30'		5.3072	1.59617	0.300755		-4.16841	-1.57428	0.377668		-33.0421	-13.3841	0.405063		-0.150774	-0.180805	1.19918		141.217	473.611	332.395
'100'	'0'		7.40829	2.61177	0.352547		-5.76921	-2.694	0.466961		-51.1821	-26.9293	0.526147		-0.152101	-0.236118	1.55237		51.4523	240.945	189.492
'100'	'1'		7.14969	2.54134	0.355448		-6.08882	-2.37428	0.38994		-53.6961	-24.1768	0.450252		-0.17098	-0.230146	1.34604		62.6747	275.604	212.93
'171'	'0'		7.5454	3.20328	0.424534		-5.63388	-2.87718	0.510693		-52.2348	-23.1999	0.444146		-0.142349	-0.177913	1.24984		40.492	233.163	192.671
'171'	'1'		7.42057	2.36787	0.319096		-5.7996	-2.47995	0.427607		-52.379	-23.2152	0.443216		-0.156052	-0.218086	1.39752		60.2673	292.286	232.019
'171'	'2'		5.91482	2.57368	0.435124		-4.68843	-3.03518	0.647376		-34.6939	-27.5428	0.793881		-0.145957	-0.234457	1.60635		108.209	297.426	189.217
'210'	'2'		6.33374	2.45563	0.387705		-6.36842	-3.03804	0.477047		-50.138	-23.1957	0.462637		-0.186856	-0.22128	1.18423		80.1801	363.247	283.067
'210'	'3'		6.51878	2.09426	0.321266		-4.83498	-2.40234	0.496866		-37.8886	-19.102	0.504161		-0.137739	-0.2102	1.52608		87.9781	429.977	341.999
'210'	'4'		8.10919	1.70341	0.21006		-6.33319	-2.06304	0.32575		-64.3189	-14.83	0.23057		-0.159541	-0.213998	1.34133		34.0806	577.105	543.024
'210'	'6'		6.8093	2.11924	0.311228		-5.21895	-2.25047	0.431212		-43.5612	-17.667	0.405568		-0.154349	-0.192346	1.24618		67.6099	416.176	348.566
'210'	'11'		6.99891	1.13791	0.162583		-5.83515	-1.78492	0.30589		-48.2224	-12.3866	0.256865		-0.156999	-0.238663	1.52015		68.8261	772.202	703.376
'302'	'0'		7.34002	3.82707	0.521397		-4.18263	-2.23846	0.53518		-41.1823	-29.3413	0.712474		-0.125384	-0.175277	1.39792		53.1566	140.17	87.0131
'302'	'11'		6.79813	3.85253	0.566704		-5.27303	-2.77715	0.52667		-41.2073	-29.6178	0.718752		-0.149478	-0.18793	1.25725		71.742	151.013	79.2714
'302'	'13'		6.81554	3.69699	0.542435		-5.53737	-2.57851	0.465656		-49.7157	-30.2407	0.608271		-0.161888	-0.197361	1.21912		56.7619	167.099	110.337
'303'	'2'		7.08323	3.45102	0.48721		-6.15934	-2.32485	0.377451		-48.05	-27.2139	0.566366		-0.167597	-0.183598	1.09548		79.951	178.251	98.2999
'303'	'6'		8.23146	4.8924	0.594354		-5.42191	-3.31719	0.611812		-53.66	-33.4873	0.624063		-0.145578	-0.166417	1.14315		33.6405	97.35	63.7095
'303'	'10'		6.87448	3.66023	0.532437		-5.89257	-3.27902	0.556468		-51.0651	-31.9958	0.62657		-0.170302	-0.222001	1.30357		65.781	216.16	150.379
'303'	'60'		8.26329	3.11983	0.377554		-6.11659	-2.60999	0.426707		-56.5406	-22.5955	0.399633		-0.150825	-0.182112	1.20743		40.844	289.859	249.015
'328'	'0'		6.1412	3.44657	0.561221		-4.36579	-2.23364	0.511623		-39.3953	-21.5722	0.547583		-0.146451	-0.162686	1.11086		65.5632	222.234	156.671
'328'	'1'		7.21199	2.24607	0.311436		-5.39536	-2.01977	0.374352		-49.6882	-16.3041	0.328128		-0.149607	-0.176882	1.18231		38.798	392.656	353.858
'328'	'3'		8.1036	2.99938	0.370129		-4.93347	-2.40496	0.487478		-50.7723	-23.7757	0.468281		-0.126567	-0.193613	1.52973		28.1927	244.208	216.015
'328'	'11'		7.48373	2.66076	0.355539		-5.00014	-1.82748	0.365486		-44.9889	-15.5002	0.344535		-0.138236	-0.151591	1.09661		53.7134	310.558	256.844
'328'	'20'		7.99326	2.32647	0.291054		-5.78259	-1.91289	0.330801		-52.0387	-18.3656	0.352921		-0.145056	-0.180808	1.24647		45.9713	307.451	261.479
'329'	'10'		7.07662	2.67215	0.377603		-6.68344	-2.56702	0.384086		-67.7942	-30.9391	0.456369		-0.211098	-0.256066	1.21302		45.2075	233.077	187.87
'329'	'20'		5.6011	4.18047	0.746366		-3.45495	-2.19377	0.634964		-32.9189	-26.8233	0.814829		-0.129246	-0.175459	1.35756		70.2844	159.311	89.0269
'329'	'21'		5.4816	3.67479	0.670386		-3.75603	-2.22488	0.592348		-32.4144	-28.227	0.870817		-0.127691	-0.183054	1.43357		72.6411	157.381	84.74
Hypercapnia
'155'	'0'		7.62561	3.41033	0.447221		-7.2233	-2.73227	0.378258		-116.343	-49.1192	0.422194		-0.264415	-0.2569	0.971576		2.7754	44.5526	41.7772
'155'	'2'		7.46985	3.68556	0.493391		-5.99162	-2.5862	0.431637		-103.369	-45.4973	0.440146		-0.240448	-0.221938	0.923019		2.94183	51.6027	48.6609
'155'	'3'		7.95447	3.46232	0.435267		-7.72571	-2.65076	0.343108		-119.652	-48.0504	0.401585		-0.263841	-0.249483	0.94558		3.6116	31.0629	27.4513
'156'	'0'		9.1986	2.47046	0.268569		-7.61051	-1.90352	0.250118		-115.923	-28.1849	0.243134		-0.220848	-0.221928	1.00489		2.37938	118.649	116.269
'156'	'30'		7.38695	2.65268	0.359104		-6.28821	-2.01243	0.320033		-92.7586	-31.9149	0.344064		-0.232886	-0.220255	0.945761		6.86213	143.488	136.625
'100'	'0'		6.6698	4.0399	0.6057		-8.39448	-4.05955	0.483597		-139.262	-79.3557	0.569831		-0.366285	-0.353477	0.965032		1.77559	11.0111	9.23556
'100'	'1'		6.62997	3.4789	0.524724		-8.64376	-3.76752	0.435866		-142.182	-67.0695	0.471717		-0.37515	-0.356184	0.949446		2.0644	34.8448	32.7804
'171'	'0'		7.71002	3.61316	0.468632		-7.27368	-2.82384	0.388227		-106.755	-39.7672	0.37251		-0.244988	-0.223537	0.912442		3.85791	76.7475	72.8896
'171'	'1'		7.00078	3.59715	0.513822		-7.23602	-2.80728	0.38796		-114.562	-49.4005	0.431211		-0.28612	-0.253077	0.884513		2.82113	28.042	25.2209
'171'	'2'		6.45623	3.56745	0.552559		-6.7027	-3.25013	0.484899		-108.599	-61.0656	0.562302		-0.296557	-0.30141	1.01636		2.93963	26.6746	23.7349
'210'	'2'		6.61778	3.52816	0.533133		-7.99291	-3.50301	0.438264		-132.109	-53.1158	0.402059		-0.358701	-0.29476	0.821744		2.28273	63.3026	61.0199
'210'	'3'		7.26396	3.47073	0.477801		-9.40178	-3.17259	0.337445		-152.919	-57.8275	0.378156		-0.366274	-0.298541	0.815076		1.99449	26.0723	24.0778
'210'	'4'		6.39005	3.32345	0.520098		-7.97519	-2.94664	0.369476		-135.118	-46.5829	0.344757		-0.367169	-0.264375	0.720037		2.19272	42.251	40.0583
'210'	'6'		7.74292	3.18273	0.41105		-9.06338	-3.09559	0.34155		-140.461	-40.1575	0.285899		-0.323791	-0.263155	0.812731		2.52848	113.138	110.61
'210'	'11'		7.02641	2.78783	0.396765		-8.29966	-3.04904	0.36737		-132.716	-47.4408	0.357461		-0.337013	-0.312316	0.926717		2.21184	87.7029	85.4911
'302'	'0'		6.83438	5.09576	0.745607		-7.50772	-3.45562	0.460276		-121.459	-61.2038	0.503905		-0.311913	-0.246392	0.789939		3.14693	39.8268	36.6799
'302'	'11'		7.78355	4.68456	0.601853		-8.86281	-3.49481	0.394324		-138.953	-57.5002	0.413811		-0.314515	-0.252526	0.802906		1.95472	41.018	39.0633
'302'	'13'		6.99974	3.91596	0.559443		-9.88223	-3.06175	0.309824		-161.562	-57.2213	0.354176		-0.400599	-0.276699	0.690712		1.46379	38.4761	37.0123
'303'	'2'		7.34381	4.55255	0.619916		-8.66824	-2.27251	0.262165		-136.703	-37.2453	0.272455		-0.326026	-0.177021	0.542967		2.33397	73.8806	71.5467
'303'	'6'		7.22344	4.93548	0.68326		-7.35842	-2.48695	0.337973		-115.999	-42.7944	0.368921		-0.28515	-0.203589	0.713972		2.78141	68.3665	65.5851
'303'	'10'		7.38054	4.0594	0.550014		-9.6641	-3.00987	0.311448		-155.743	-46.939	0.301389		-0.369671	-0.246129	0.665804		1.7443	76.8178	75.0735
'303'	'60'		7.38975	4.06701	0.550358		-9.37849	-3.18919	0.340054		-154.36	-49.5721	0.321146		-0.36116	-0.248357	0.687665		1.47274	75.2777	73.805
'328'	'0'		7.50936	3.69042	0.491442		-8.42327	-2.53491	0.300942		-135.11	-35.8496	0.265337		-0.317606	-0.206388	0.649824		1.95852	127.636	125.677
'328'	'1'		6.17942	2.6275	0.425201		-8.03781	-1.93349	0.240549		-120.642	-25.9207	0.214856		-0.348403	-0.193872	0.556459		2.18184	165.718	163.536
'328'	'3'		7.23297	3.39718	0.46968		-9.22517	-2.65627	0.287937		-145.815	-43.2276	0.296456		-0.36272	-0.2445	0.674074		1.96123	69.4997	67.5385
'328'	'11'		6.94947	3.25006	0.467671		-9.26973	-2.22034	0.239525		-159.877	-38.6095	0.241496		-0.397802	-0.214856	0.540107		1.20255	57.221	56.0185
'328'	'20'		7.36969	3.3198	0.450467		-9.04418	-2.84829	0.314931		-150.953	-47.7093	0.316054		-0.366096	-0.258307	0.705572		1.50239	47.4756	45.9732
'329'	'10'		7.21402	3.48157	0.482612		-9.65471	-4.16431	0.431325		-148.311	-71.5044	0.482124		-0.36485	-0.401485	1.10041		3.19439	56.5612	53.3668
'329'	'20'		6.81392	3.44493	0.505572		-8.27552	-4.50237	0.544059		-129.015	-70.3539	0.545314		-0.345608	-0.385289	1.11482		3.1179	48.4	45.2821
'329'	'21'		6.78874	3.13609	0.461954		-9.06666	-3.41252	0.376381		-138.656	-55.0935	0.397339		-0.35912	-0.321996	0.896626		2.13161	85.5357	83.4041
