# Supplementary material for: Opioids depress breathing through two small brainstem sites
Source: eLife. 2020 Feb 19;9:e52694. doi: 10.7554/eLife.52694 (PMC7077984; doi:10.7554/eLife.52694)
Supplement: Figure 2—source data 1. [file elife-52694-fig2-data1.xlsx]

## Sheet: Sheet1
Experimental
			Baseline				PBC mOR KO
Instantaneous Frequency
WeanID	AnimalID	saline	morphine	normalized		saline	morphine	normalized
'328'	'0'	7.50936	3.69042	0.491442		7.76204	4.59847	0.59243
'328'	'1'	6.17942	2.6275	0.425201		5.78178	3.7955	0.656459
'328'	'11'	6.94947	3.25006	0.467671		7.06016	4.04025	0.57226
'155'	'2'	7.46985	3.68556	0.493391		6.88458	4.41255	0.640932
'155'	'3'	7.95447	3.46232	0.435267		6.48893	4.90067	0.755234
'303'	'60'	7.38975	4.06701	0.550358		7.32057	5.24652	0.716682
'155'	'30'					7.00041	3.39424	0.484864
Peak Flow
'328'	'0'	-8.42327	-2.53491	0.300942		-5.73025	-3.28389	0.573079
'328'	'1'	-8.03781	-1.93349	0.240549		-4.80476	-3.28716	0.684147
'328'	'11'	-9.26973	-2.22034	0.239525		-6.11139	-2.84446	0.465436
'155'	'2'	-5.99162	-2.5862	0.431637		-5.91621	-5.04365	0.852515
'303'	'60'	-9.37849	-3.18919	0.340054		-8.04267	-5.22112	0.649177
'155'	'3'	-7.72571	-2.65076	0.343108		-4.30387	-3.69516	0.858566
'155'	'30'					-5.5975	-3.25694	0.581856
Pause Duration
'328'	'0'	1.95852	127.636	125.677		1.79158	7.53584	5.74426
'328'	'1'	2.18184	165.718	163.536		3.06683	11.8227	8.75589
'328'	'11'	1.20255	57.221	56.0185		1.70497	9.54019	7.83522
'155'	'2'	2.94183	51.6027	48.6609		3.10664	16.3064	13.1997
'155'	'3'	3.6116	31.0629	27.4513		8.01637	20.7903	12.774
'303'	'60'	1.47274	75.2777	73.805		2.12072	9.35932	7.2386
'155'	'30'					9.42062	29.2798	19.8592
