# Supplementary material for: Opioids depress breathing through two small brainstem sites
Source: eLife. 2020 Feb 19;9:e52694. doi: 10.7554/eLife.52694 (PMC7077984; doi:10.7554/eLife.52694)
Supplement: Figure 2—source data 2. [file elife-52694-fig2-data2.xlsx]

## Sheet: Sheet1
Sham
			Baseline				PBC sham KO
Instantaneous Frequency
WeanID	Animal	saline	morphine	normalized		saline	morphine	normalized
'100'	'0'	6.6698	4.0399	0.6057		6.4528	3.92859	0.60882
'100'	'1'	6.62997	3.4789	0.524724		6.69768	3.46971	0.518047
'171'	'0'	7.71002	3.61316	0.468632		7.55261	3.51493	0.465393
'171'	'1'	7.00078	3.59715	0.513822		7.04661	3.62985	0.51512
'324'	'3'	7.25259	3.71229	0.511857		6.77851	3.12649	0.461235
'324'	'20'	6.18979	3.32059	0.536463		6.79078	2.72511	0.401296
'328'	'20'	7.36969	3.3198	0.450467		6.87513	2.35668	0.342784
Peak Flow
'100'	'0'	-8.39448	-4.05955	0.483597		-8.42515	-4.29821	0.510165
'100'	'1'	-8.64376	-3.76752	0.435866		-8.27399	-4.04812	0.489259
'171'	'0'	-7.27368	-2.82384	0.388227		-10.5145	-3.61243	0.343568
'171'	'1'	-7.23602	-2.80728	0.38796		-9.93787	-3.8453	0.386934
'324'	'3'	-7.3134	-3.44737	0.471378		-7.68856	-3.48289	0.452996
'324'	'20'	-6.57312	-4.03292	0.613547		-8.46558	-3.25852	0.384914
'328'	'20'	-9.04418	-2.84829	0.314931		-9.59792	-2.43947	0.254166
Pause Duration
'100'	'0'	1.77559	11.0111	9.23556		3.37412	8.6345	5.26039
'100'	'1'	2.0644	34.8448	32.7804		2.16788	16.6616	14.4937
'171'	'0'	3.85791	76.7475	72.8896		1.76051	115.801	114.04
'171'	'1'	2.82113	28.042	25.2209		1.81682	22.7243	20.9075
'324'	'3'	1.6201	6.09309	4.47299		2.06088	9.78968	7.72881
'324'	'20'	1.87807	7.17992	5.30185		1.54111	27.9849	26.4438
'328'	'20'	1.50239	47.4756	45.9732		2.58652	118.479	115.892
