# Supplementary material for: Opioids depress breathing through two small brainstem sites
Source: eLife. 2020 Feb 19;9:e52694. doi: 10.7554/eLife.52694 (PMC7077984; doi:10.7554/eLife.52694)
Supplement: Figure 3—figure supplement 2—source data 1. [file elife-52694-fig3-figsupp2-data1.xlsx]

## Sheet: Sheet1
Experimental
			Baseline				KF mOR KO
Instantaneous Frequency
WeanID	AnimalID	saline	morphine	normalized		saline	morphine	normalized
'156'	'0'	9.1986	2.47046	0.268569		7.2899	3.30308	0.453104
'156'	'30'	7.38695	2.65268	0.359104		6.40929	3.9969	0.62361
'302'	'0'	6.83438	5.09576	0.745607		6.84378	4.79961	0.701309
'303'	10'	7.38054	4.0594	0.550014		7.16871	4.25843	0.59403
Peak Flow
'156'	'0'	-7.61051	-1.90352	0.250118		-6.66727	-3.16823	0.475192
'156'	'30'	-6.28821	-2.01243	0.320033		-6.46421	-3.19247	0.493868
'302'	'0'	-7.50772	-3.45562	0.460276		-6.94426	-4.80002	0.691221
'303'	'10'	-9.6641	-3.00987	0.311448		-7.86934	-3.55163	0.451325
Pause Duration
'156'	'0'	2.37938	118.649	116.269		3.80616	103.331	99.5247
'156'	'30'	6.86213	143.488	136.625		10.7972	128.336	117.539
'302'	'0'	3.14693	39.8268	36.6799		2.93835	14.5911	11.6527
'303'	'10'	1.7443	76.8178	75.0735		2.63742	74.1945	71.5571
