# Supplementary material for: Opioids depress breathing through two small brainstem sites
Source: eLife. 2020 Feb 19;9:e52694. doi: 10.7554/eLife.52694 (PMC7077984; doi:10.7554/eLife.52694)
Supplement: Figure 3—source data 1. [file elife-52694-fig3-data1.xlsx]

## Sheet: Sheet1
Experimental
			Baseline				PBC mOR KO				KF mOR KO				PBC KF mOR KO
Instantaneous Frequency
WeanID	AnimalID	saline	morphine	normalized		saline	morphine	normalized		saline	morphine	normalized		saline	morphine	normalized
'328'	'0'	7.50936	3.69042	0.491442		7.76204	4.59847	0.59243
'328'	'1'	6.17942	2.6275	0.425201		5.78178	3.7955	0.656459						6.70586	4.37475	0.652377
'328'	'11'	6.94947	3.25006	0.467671		7.06016	4.04025	0.57226						6.63041	4.39144	0.662319
'155'	'2'	7.46985	3.68556	0.493391		6.88458	4.41255	0.640932						6.26273	5.04579	0.805685
'155'	'3'	7.95447	3.46232	0.435267		6.48893	4.90067	0.755234						6.92058	5.84136	0.844055
'303'	'60'	7.38975	4.06701	0.550358		7.32057	5.24652	0.716682						8.28604	5.70653	0.688692
'155'	'30'					7.00041	3.39424	0.484864						6.82355	4.00071	0.586308
'156'	'0'	9.1986	2.47046	0.268569						7.2899	3.30308	0.453104		6.28782	3.45759	0.549886
'156'	'30'	7.38695	2.65268	0.359104						6.40929	3.9969	0.62361		6.3081	4.84681	0.768346
'302'	'0'	6.83438	5.09576	0.745607						6.84378	4.79961	0.701309		6.73647	6.01459	0.892839
'303'	10'	7.38054	4.0594	0.550014						7.16871	4.25843	0.59403		7.72343	4.45633	0.576988
Peak Flow
'328'	'0'	-8.42327	-2.53491	0.300942		-5.73025	-3.28389	0.573079
'328'	'1'	-8.03781	-1.93349	0.240549		-4.80476	-3.28716	0.684147						-5.32292	-4.56326	0.857284
'328'	'11'	-9.26973	-2.22034	0.239525		-6.11139	-2.84446	0.465436						-5.90384	-3.09988	0.525062
'155'	'2'	-5.99162	-2.5862	0.431637		-5.91621	-5.04365	0.852515						-7.66619	-5.59166	0.729392
'303'	'60'	-9.37849	-3.18919	0.340054		-8.04267	-5.22112	0.649177						-5.50197	-4.34744	0.790161
'155'	'3'	-7.72571	-2.65076	0.343108		-4.30387	-3.69516	0.858566						-7.60955	-4.10234	0.539104
'155'	'30'					-5.5975	-3.25694	0.581856						-8.97108	-5.03674	0.561441
'156'	'0'	-7.61051	-1.90352	0.250118						-6.66727	-3.16823	0.475192		-6.40027	-3.49464	0.546014
'156'	'30'	-6.28821	-2.01243	0.320033						-6.46421	-3.19247	0.493868		-6.47004	-4.84612	0.749009
'302'	'0'	-7.50772	-3.45562	0.460276						-6.94426	-4.80002	0.691221		-5.40003	-4.45255	0.824542
'303'	'10'	-9.6641	-3.00987	0.311448						-7.86934	-3.55163	0.451325		-6.21882	-3.82998	0.61587
Pause Duration
'328'	'0'	1.95852	127.636	125.677		1.79158	7.53584	5.74426
'328'	'1'	2.18184	165.718	163.536		3.06683	11.8227	8.75589						2.48591	9.24885	6.76293
'328'	'11'	1.20255	57.221	56.0185		1.70497	9.54019	7.83522						2.12747	6.09798	3.9705
'155'	'2'	2.94183	51.6027	48.6609		3.10664	16.3064	13.1997						2.90749	9.94521	7.03773
'155'	'3'	3.6116	31.0629	27.4513		8.01637	20.7903	12.774						3.29339	67.3903	64.0969
'303'	'60'	1.47274	75.2777	73.805		2.12072	9.35932	7.2386						2.28161	4.21064	1.92903
'155'	'30'					9.42062	29.2798	19.8592						3.55065	35.4104	31.8597
'156'	'0'	2.37938	118.649	116.269						3.80616	103.331	99.5247		3.83911	126.21	122.371
'156'	'30'	6.86213	143.488	136.625						10.7972	128.336	117.539		4.13284	41.8471	37.7143
'302'	'0'	3.14693	39.8268	36.6799						2.93835	14.5911	11.6527		2.82732	2.77724	-0.0500765
'303'	'10'	1.7443	76.8178	75.0735						2.63742	74.1945	71.5571		2.21359	20.8732	18.6596
